# Supplementary material for: Facile and green release of template from mesostructured titania
Source: Royal Society of Chemistry journal article supplement (doi:10.1039/c3ra42981d), 2013-01-01

**Supporting information S1** : Evolution of the nitrogen adsorption-desorption isotherm with the corresponding BJH pore size distribution curve (insert) a : 15; b : 30 minutes; c : 2; d :5; e :8 and f :24 hours.

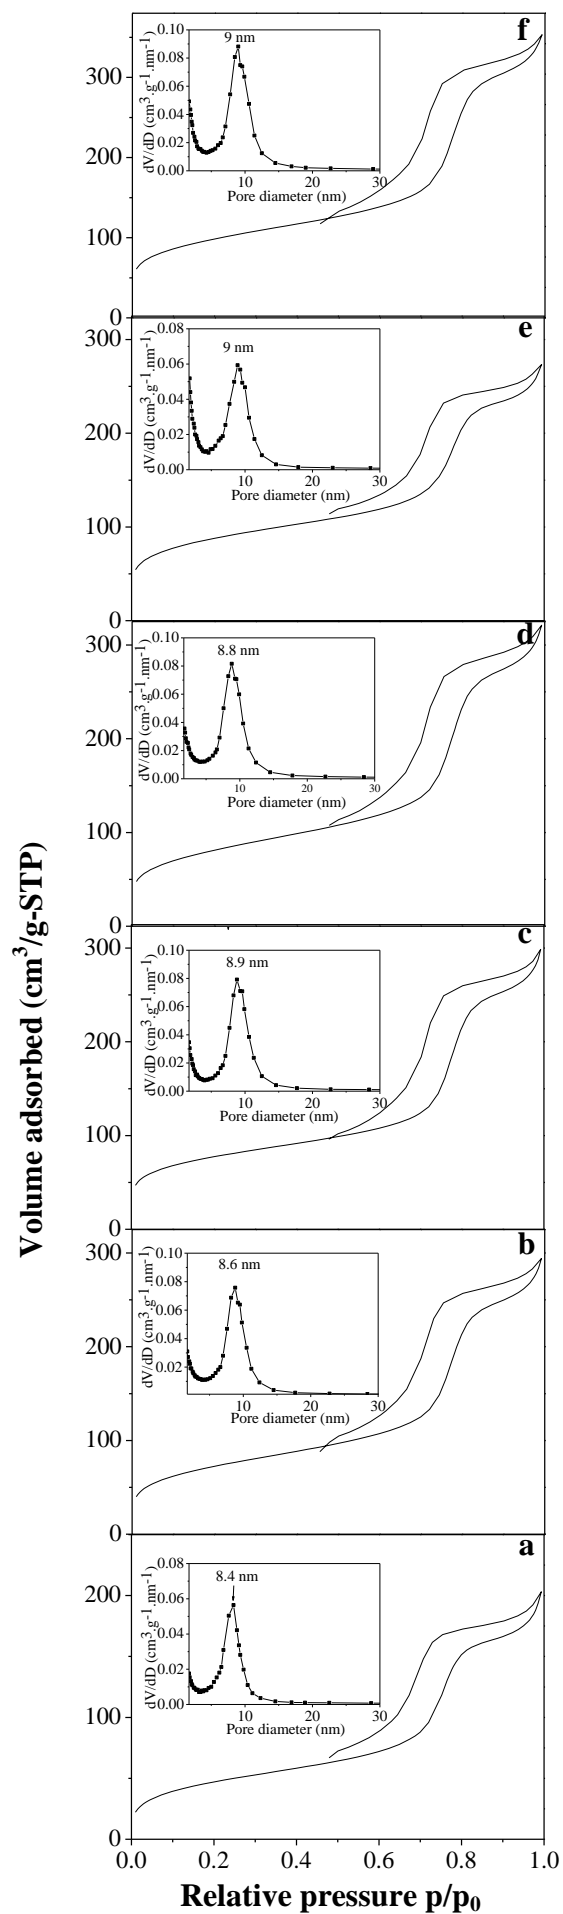

**Supporting information S2 :** TGA data of sample recovered after surfactant extraction by water during 5 hours at room temperature.

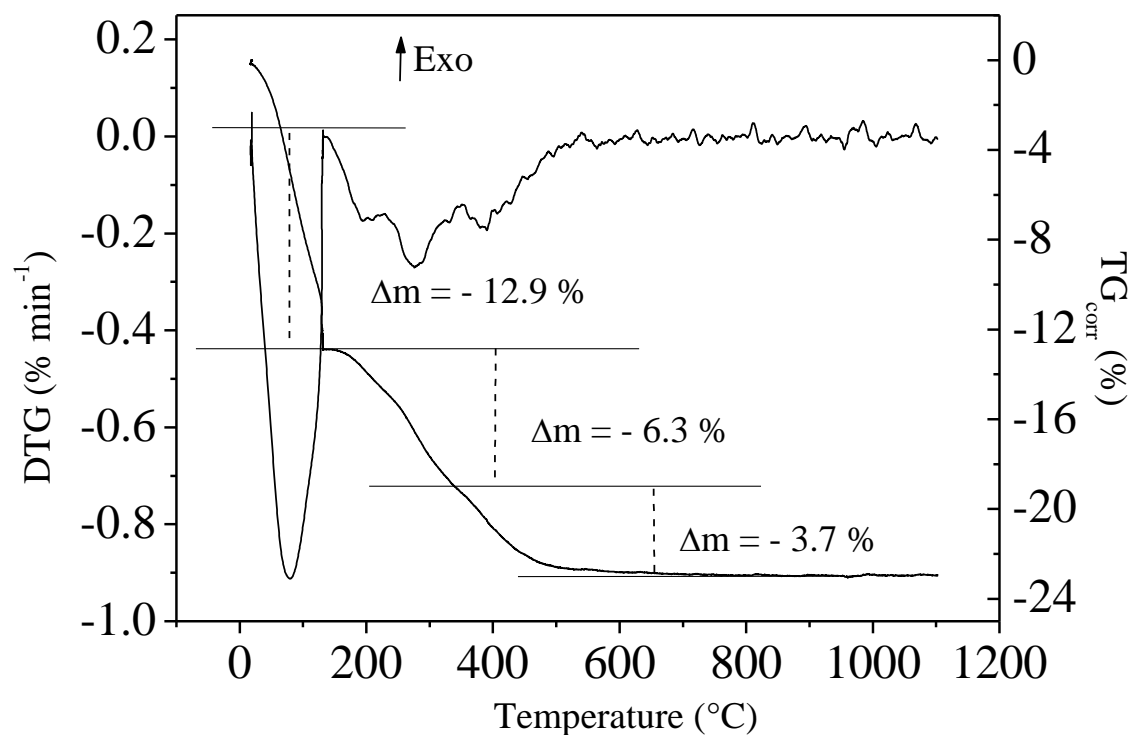

The thermogravimetric analyses were performed on a Setaram TGA92 Thermobalance using alumina crucibles and sample weights of 10-20 mg. The measurements were recorded in a dry air flow at 5°C min<sup>-1</sup> heating rate over the temperature range 30-1100 °C with a plateau of one hour at 130°C.

**Supporting information S3** : Evolution of the infrared spectra with the extraction time at room temperature.

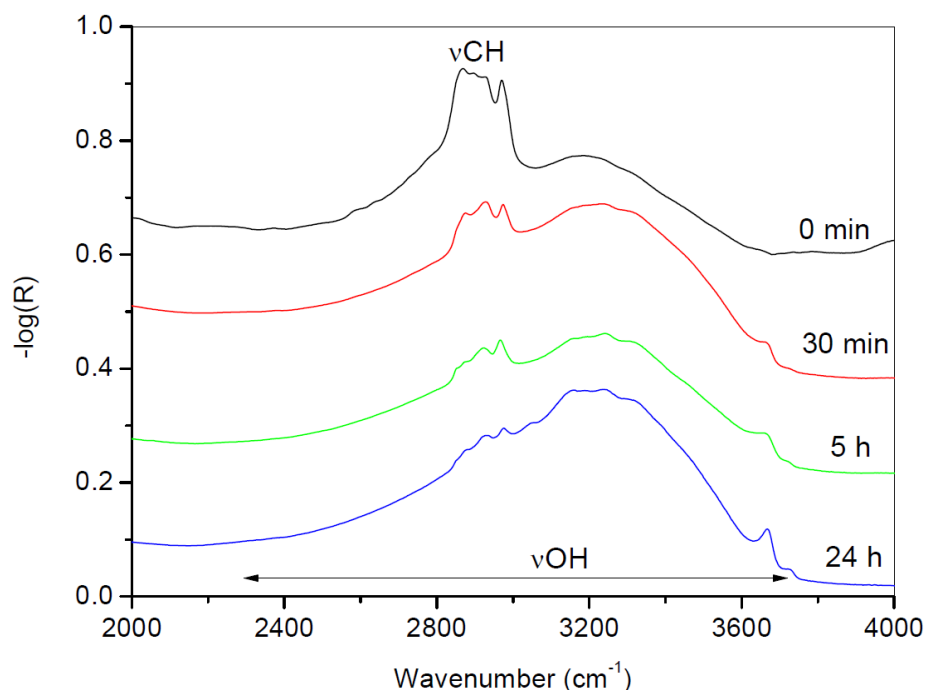

The infrared spectra were recorded in the mid-Infrared range on a Fourier transform infrared spectrometer Nicolet 8700, equipped with a KBr beamsplitter and a DTGS detector. The spectra in diffuse reflectance (DRIFTS) mode were collected using a Harrick Praying Mantis<sup>TM</sup> equipment and an environmental cell. To perform the analysis, the powder was first diluted in a KBr matrix (5 wt.%). Then the sample was kept inside the chamber under vacuum ( $10^{-4}$  Torr) to remove physisorbed water. Reflectances of the sample and of the pure KBr, used as a non-absorbing reference powder, were measured under the same conditions, after 30 minutes of evacuation. The spectra are shown in pseudo-absorbance ( $-\log R$ ) mode. The spectrum resolution was  $4 \text{ cm}^{-1}$  and the acquisition time was 1 min.

**Supporting information S4 :**  $^1\text{H}$  decoupled  $^{13}\text{C}$  MAS NMR spectra of as-synthesized ordered mesoporous titania (a) and silica (b).

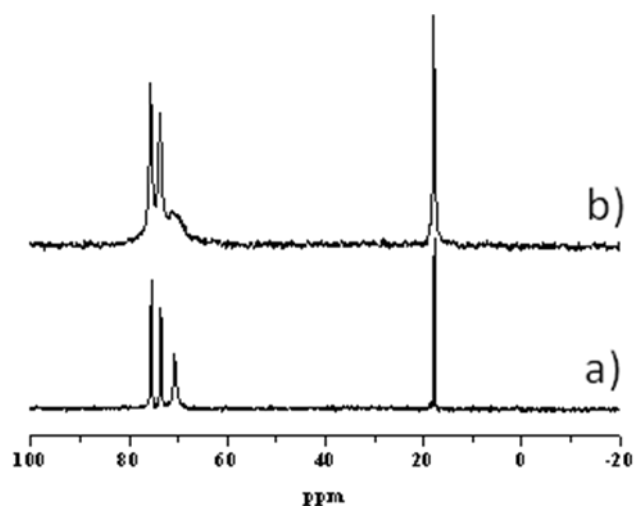

$^{13}\text{C}$  and  $^1\text{H}$  solid state MAS NMR spectra were recorded on a Bruker Avance II-400 spectrometer operating at a Larmor frequency of 100.63 and 400.18 MHz, respectively.  $^1\text{H}$ - $^{13}\text{C}$  solid state CPMAS NMR experiments were performed with a  $\pi/2$   $^1\text{H}$  pulse duration of 4.5  $\mu\text{s}$ , a contact time of 1.5 ms, a recycle delay of 8 s and spinning frequency of 12 kHz.  $^1\text{H}$  decoupled  $^{13}\text{C}$  MAS NMR spectra were recorded with a  $^{13}\text{C}$  pulse duration of 1.7  $\mu\text{s}$  corresponding to a flip angle of  $\pi/6$  and a recycle delay of 60 s.  $^1\text{H}$  MAS NMR spectra were performed with a  $\pi/2$   $^1\text{H}$  pulse duration of 4.7  $\mu\text{s}$ , a recycle delay of 8 s and spinning frequency of 30 kHz.  $^1\text{H}$  and  $^{13}\text{C}$  chemical shifts were referenced to tetramethylsilane (TMS).

**Supporting information S5:** Evolution of the specific surface area (■) and the pore volume (○) with the extraction duration at 80°C (A) and 100°C (B).

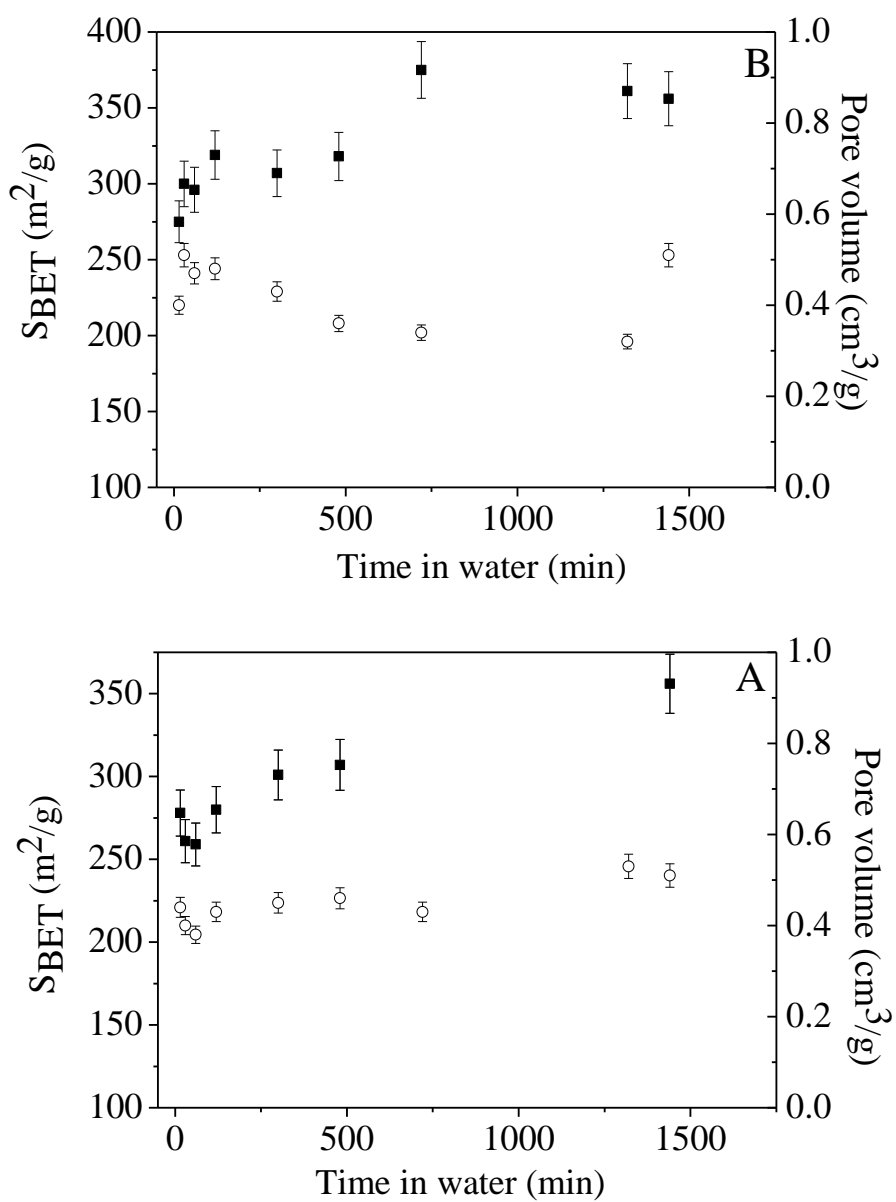

**Supporting information S6** : XRD of the mesoporous titania obtained after surfactant extraction by water during 8 (a) and 24 hours (b) at 80 (A) or 100°C (B).

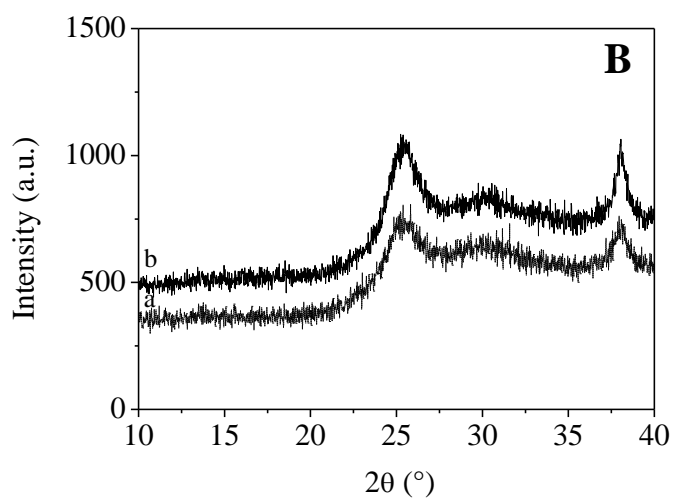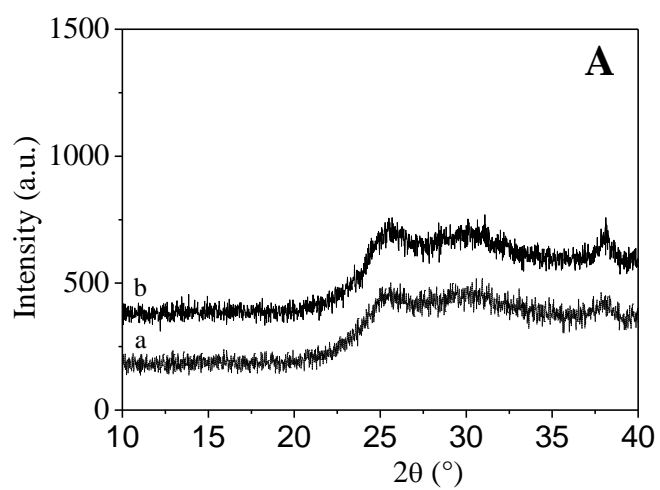

Supplement: c3ra42981d.pdf [file c3ra42981d.pdf]
